# Supplementary material for: Investigation on the ability of heteroatom-doped graphene for biorecognition
Source: Royal Society of Chemistry journal article supplement (doi:10.1039/c6nr09313b), 2017-01-01
Supplement: c6nr09313b1.pdf [file c6nr09313b1.pdf]

## *Supporting Information*

### **Investigation on heteroatom doped graphene ability for biorecognition**

Huidi Tian,<sup>a</sup> Zdenek Sofer,<sup>b</sup> Martin Pumera,<sup>a</sup> Alessandra Bonanni<sup>a\*</sup>

<sup>a</sup>Division of Chemistry & Biological Chemistry, School of Physical and Mathematical Sciences, Nanyang Technological University, Singapore 637371

<sup>b</sup>Department of Inorganic Chemistry, Institute of Chemical Technology, 166 28 Prague 6, Czech Republic

Fax: (65) 6791-1961

Email: [a.bonanni@ntu.edu.sg](mailto:a.bonanni@ntu.edu.sg)

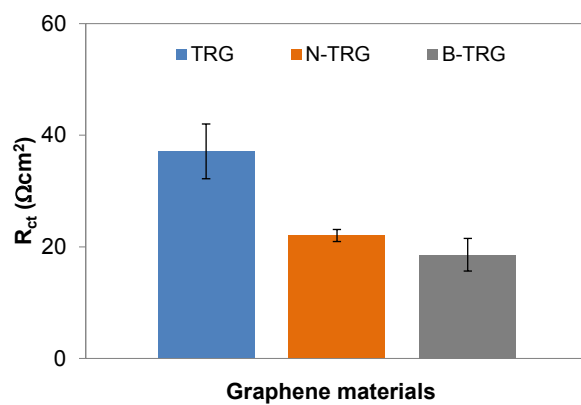

Figure S1. Impedimetric characterization of undoped thermally reduced graphene (TRG), nitrogen-doped thermally reduced graphene (N-TRG) and boron-doped thermally reduced graphene (B-TRG). Histograms represent the charge transfer resistance normalized by the electroactive surface area of TRG, N-TRG and B-TRG. All measurements were carried out in 0.1 M PBS buffer solution containing 10 mM  $\text{K}_3[\text{Fe}(\text{CN})_6]/\text{K}_4[\text{Fe}(\text{CN})_6]$ .

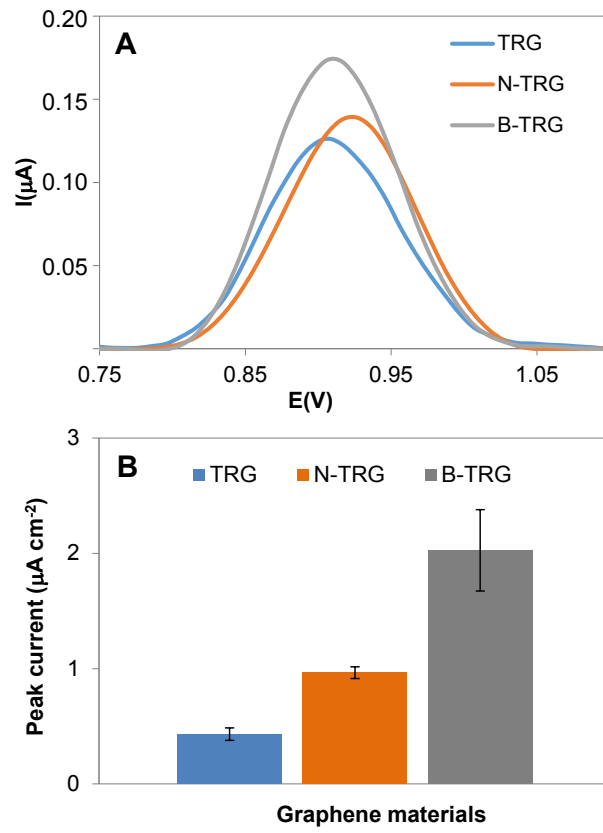

Figure S2. Differential pulse voltammetry (DPV) measurement for FB<sub>1</sub> aptamer on TRG, N-TRG and B-TRG. A: DPV signal for guanine peak. B: histograms representing peak current per square surface area unit.
